# Supplementary material
Source: Springer Nature journal article supplement (https://www.springermedizin.de/resource/supplementary/12865_2009_279_MOESM5_ESM.pdf/9427662)

## Pre-expansion

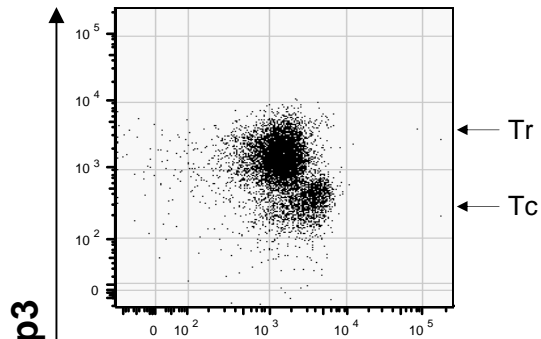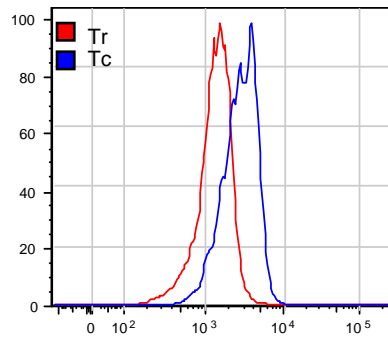

## Post-expansion

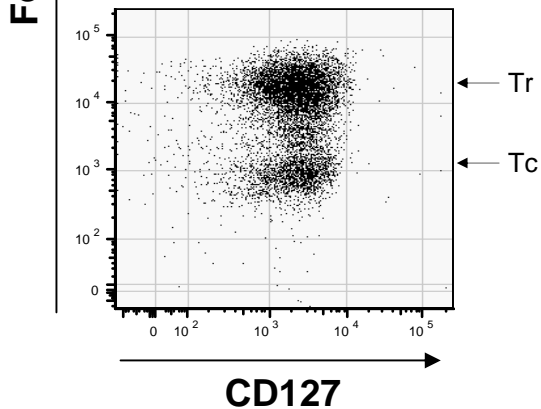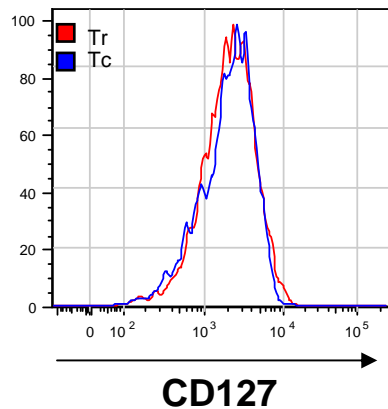

Supplement: MOESM5 [file 9427662]
